# Supplementary material
Source: Royal Society of Chemistry journal article supplement (doi:10.1039/d6cc03057b)

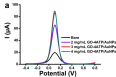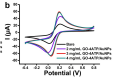

Supplement: d6cc03057b4.pdf [file d6cc03057b4.pdf]

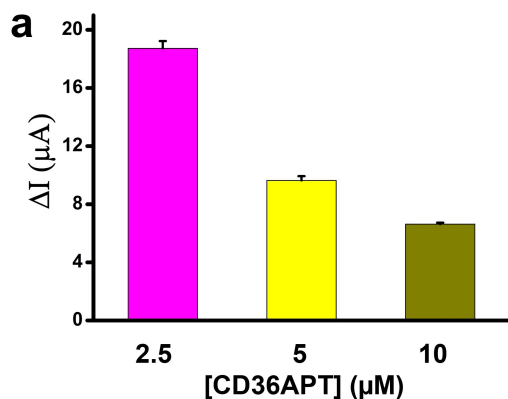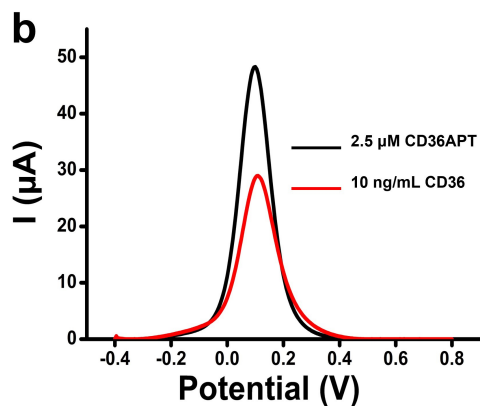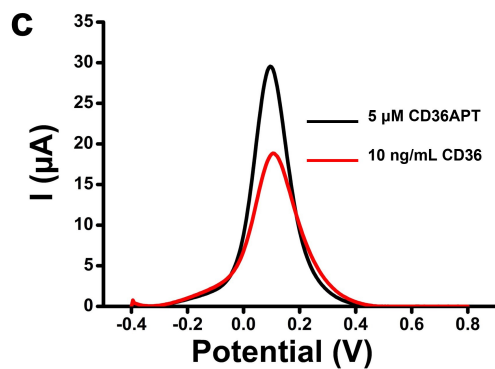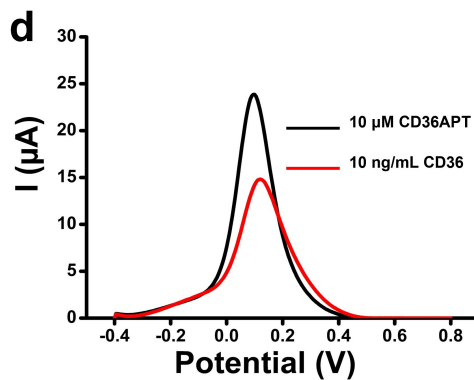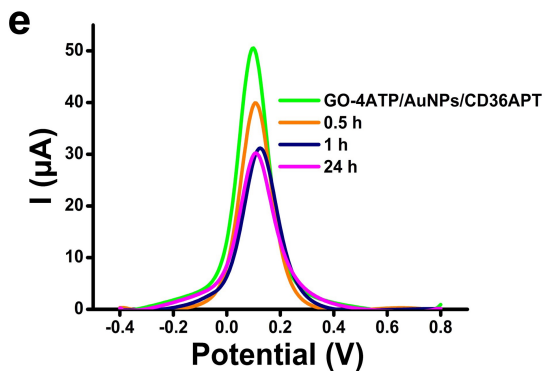

Supplement: d6cc03057b5.pdf [file d6cc03057b5.pdf]
